# Supplementary material for: The oncogenicity of tumor-derived mutant p53 is enhanced by the recruitment of PLK3
Source: PubMed Central journal article supplement (PMC7846773; doi:10.1038/s41467-021-20928-8), 2021-01-29
Supplement: 41467_2021_20928_MOESM2_ESM.pdf [file 41467_2021_20928_MOESM2_ESM.pdf]

## **Description of Additional Supplementary Files**

File Name: Supplementary Data 1

Description: Abbreviated list of genes that are activated by p53-R273H and require an intact transactivation domain.

File Name: Supplementary Data 2

Description: Complete list of genes that are activated by p53-R273H and require an intact transactivation domain.

File Name: Supplementary Data 3

Description: Complete list of genes that have p53 bound to the promoter. Complete list of genes that are activated by p53-R273H and do not require an intact transactivation domain.

File Name: Supplementary Data 4

Description: DAVID analysis of Supplementary Tables 1-3.

File Name: Supplementary Data 5a

Description: RNA seq analysis from mouse lung RNA isolated mouse cells made near homogenously expressing p53 <sup>-/-</sup>, p53-R172H<sup>-/-</sup> and p53-L25Q/W26S/R172H<sup>-/-</sup>.

File Name: Supplementary Data 5b

Description: DAVID analysis of the RNA seq data presented in Supplementary Table 5a.

File Name: Supplementary Data 6

Description: List of primers used for qPCR.
